# Supplementary material for: Racism, homophobia, and the sexual health of young Black men who have sex with men in the United States: A systematic review
Source: PubMed Central journal article supplement (PMC11737682; doi:10.1371/journal.pone.0316532), 2025-01-16
Supplement: pone.0316532.s002.pdf [file pone.0316532.s002.pdf]

**S1 Appendix.** Search strategies

**Librarian searcher:** Leila Ledbetter

**Peer Reviewer:** Samantha Kaplan, PhD, MLIS

**Original Search Date:** May 20, 2022

**Update Search Date:** March 13, 2023, August 15, 2023

**Database:** MEDLINE (PubMed)

| Set #            |                                                                                                                                                                                                                                                                                                                                                                                                                                                                                                                                                                                                                                                                                                                                                                                   | Results<br>May 20,<br>2022 | Results<br>March<br>13, 2022 | Results<br>August<br>15,<br>2023 |
|------------------|-----------------------------------------------------------------------------------------------------------------------------------------------------------------------------------------------------------------------------------------------------------------------------------------------------------------------------------------------------------------------------------------------------------------------------------------------------------------------------------------------------------------------------------------------------------------------------------------------------------------------------------------------------------------------------------------------------------------------------------------------------------------------------------|----------------------------|------------------------------|----------------------------------|
| 1<br>Men         | "Homosexuality, Male"[Mesh] OR "men having sex with men"[tiab] OR "men who have sex with men"[tiab] OR "men who have sex with other men"[tiab] OR MSM[tiab] OR BMSM[tiab] OR AAMSM[tiab] OR (("Male"[Mesh] OR "men"[Mesh:NoExp] OR male[tiab] OR males[tiab] OR men[tiab] OR man[tiab]) AND ("Bisexuality"[Mesh] OR bisexual*[tiab] OR homosexual*[tiab] OR gay[tiab] OR gays[tiab] OR LGBT[tiab] OR LGBTQ[tiab] OR LGBTI[tiab] OR LGBTQIA[tiab] OR GLBT[tiab] OR GLBTQ[tiab] OR nonheterosexual[tiab] OR "non-heterosexual"[tiab] OR "non heterosexuals"[tiab] OR nonheterosexuals[tiab] OR pansexual*[tiab] OR polysexual*[tiab] OR queer[tiab] OR "same sex"[tiab] OR "same-sex"[tiab] OR "sexual minorities"[tiab] OR "sexual minority"[tiab] OR "sexual orientation"[tiab])) | 48,539                     | 51,234                       |                                  |
| 2<br>Young adult | "Young Adult"[Mesh] OR "Adolescent"[Mesh] OR "Adolescent Health Services"[Mesh] OR "young adult"[tiab] OR "young adults"[tiab] OR "young adulthood"[tiab] OR AYA[tiab] OR adolescence[tiab] OR adolescent[tiab] OR adolescents[tiab] OR youth[tiab] OR youths[tiab] OR "emerging adult"[tiab] OR "emerging adults"[tiab] OR teen[tiab] OR teens[tiab] OR teenager[tiab] OR teenagers[tiab]                                                                                                                                                                                                                                                                                                                                                                                        | 2,777,857                  | 2,822,485                    |                                  |

|                                        |                                                                                                                                                                                                                                                                                                                                                                                                                                                                                                                                                                                                                                                                                                                                                                                                                                                                                                                                                                                                                                                                                                                                                                                                                                                                                                                                                                                                                                                                                     |                  |                  |  |
|----------------------------------------|-------------------------------------------------------------------------------------------------------------------------------------------------------------------------------------------------------------------------------------------------------------------------------------------------------------------------------------------------------------------------------------------------------------------------------------------------------------------------------------------------------------------------------------------------------------------------------------------------------------------------------------------------------------------------------------------------------------------------------------------------------------------------------------------------------------------------------------------------------------------------------------------------------------------------------------------------------------------------------------------------------------------------------------------------------------------------------------------------------------------------------------------------------------------------------------------------------------------------------------------------------------------------------------------------------------------------------------------------------------------------------------------------------------------------------------------------------------------------------------|------------------|------------------|--|
| <p>3<br/>Black</p>                     | <p>"African Americans"[Mesh] OR "African American"[tiab] OR "African Americans"[tiab] OR "African ancestry"[tiab] OR Black[tiab] OR Blacks[tiab] OR "minority group"[tiab] OR "minority groups"[mh] OR "minority groups"[tiab] OR "minority population"[tiab] OR "minority populations"[tiab] OR "minority health"[mh] OR "minority health"[tiab] OR minority[tiab] OR minorities[tiab] OR marginalize[tiab] OR marginalized[tiab] OR marginalizing[tiab] OR marginalise[tiab] OR marginalised[tiab] OR marginalizing[tiab] OR oppressed[tiab] OR BIPOC[tiab] OR underserved[tiab] OR disadvantaged[tiab] OR "afro-american"[tiab] OR "Afro-Caribbean"[tiab] OR "Black Caribbean"[tiab] OR "African Caribbean"[tiab] OR "Black West Indian"[tiab] OR "Afro West Indian"[tiab] OR "Black Antillean"[tiab] OR "Afro Antillean"[tiab] OR "African diaspora"[tiab] OR "Black Creole"[tiab] OR ((Jamaica[tiab] OR Jamaican[tiab] OR Haiti[tiab] OR Haitian[tiab] OR Bahamas[tiab] OR Bahamian[tiab] OR Barbados[tiab] OR Barbadian[tiab] OR Bermuda[tiab] OR Bermudian[tiab] OR Dominican[tiab] OR Grenada[tiab] OR Grenadian[tiab] OR Kitts[tiab] OR Kittian[tiab] OR Nevis[tiab] OR Nevisian[tiab] OR Lucia[tiab] OR Lucian[tiab] OR Surinam[tiab] OR Surinamese[tiab] OR Trinidad[tiab] OR Trinidadians[tiab] OR Tobago[tiab] OR Tobagonians[tiab] OR Vincent[tiab] OR Vincentian[tiab]) AND (America[tiab] OR American[tiab] OR Americans[tiab] OR Afro[tiab] OR african[tiab]))</p> | <p>338,791</p>   | <p>347,947</p>   |  |
| <p>4<br/>Discrimination<br/>Racism</p> | <p>"Systemic Racism"[Mesh] OR "Homophobia"[Mesh] OR "Masculinity"[Mesh] OR prejudice[mesh] OR "social discrimination"[mesh] OR stereotyping[mesh] OR "social</p>                                                                                                                                                                                                                                                                                                                                                                                                                                                                                                                                                                                                                                                                                                                                                                                                                                                                                                                                                                                                                                                                                                                                                                                                                                                                                                                    | <p>2,254,815</p> | <p>2,359,577</p> |  |

|                    |                                                                                                                                                                                                                                                                                                                                                                                                                                                                                                                                                                                                                                                                                                                                                                                                                                                                                                                                                                    |           |           |  |
|--------------------|--------------------------------------------------------------------------------------------------------------------------------------------------------------------------------------------------------------------------------------------------------------------------------------------------------------------------------------------------------------------------------------------------------------------------------------------------------------------------------------------------------------------------------------------------------------------------------------------------------------------------------------------------------------------------------------------------------------------------------------------------------------------------------------------------------------------------------------------------------------------------------------------------------------------------------------------------------------------|-----------|-----------|--|
| Homophobia         | <p>perception"[mesh] OR Racism[tiab] OR racism[tiab] OR Racial[tiab] OR prejudice[tiab] OR prejudiced[tiab] OR prejudicing[tiab] OR prejudices[tiab] OR discriminate[tiab] OR discriminates[tiab] OR discriminated[tiab] OR discrimination[tiab] OR discriminating[tiab] OR "social perceptions"[tiab] OR "social perception"[tiab] OR "social identity"[tiab] OR "social identities"[tiab] OR isolation[tiab] OR isolate[tiab] OR isolates[tiab] OR isolating[tiab] OR isolated[tiab] OR mistreat[tiab] OR mistreats[tiab] OR mistreated[tiab] OR alienate[tiab] OR alienates[tiab] OR alienated[tiab] OR mistreatment[tiab] OR alienation[tiab] OR homophobia[tiab] OR homophobic[tiab] OR masculine[tiab] OR masculinities[tiab] OR masculinity[tiab] OR perception[tiab] OR perceptions[tiab] OR bias[tiab] OR microaggression[tiab] or microaggressions[tiab] OR "homonegativity"[tiab]</p>                                                                   |           |           |  |
| 5<br>Sexual health | <p>"Sexual Health"[Mesh] OR "Sexual Behavior"[Mesh] OR "Sex Education"[Mesh] OR "Sexually Transmitted Diseases"[Mesh] OR "contraception behavior"[MeSH] OR "Condoms"[Mesh] OR "Contraceptive Agents, Male"[Mesh] OR "Contraceptive Devices, Male"[Mesh] OR sex[tiab] OR sexual[tiab] OR sexuality[tiab] OR sexualities[tiab] OR sexually[tiab] OR intercourse[tiab] OR "Sexually Transmitted Diseases"[tiab] OR "Sexually Transmitted Disease"[tiab] OR "Sexually Transmitted Infections"[tiab] OR "Sexually Transmitted Infection"[tiab] OR STD[tiab] OR STDs[tiab] OR STI[tiab] OR STIs[tiab] OR "Venereal Diseases"[tiab] OR "Venereal Disease"[tiab] OR contraception[tiab] OR contraceptive[tiab] OR contraceptives[tiab] OR condom[tiab] OR condoms[tiab] OR "sexual health"[tiab] OR chancroid[tiab] OR chlamydia[tiab] OR chancroids[tiab] OR gonorrhea[tiab] OR "granuloma inguinale"[tiab] OR syphilis[tiab] OR "genital herpes"[tiab] OR "genitalis</p> | 2,315,505 | 2,450,363 |  |

|    |                                                                                                                                                                                                                                                                                                                                                         |       |       |    |
|----|---------------------------------------------------------------------------------------------------------------------------------------------------------------------------------------------------------------------------------------------------------------------------------------------------------------------------------------------------------|-------|-------|----|
|    | herpes"[tiab] OR "Condylomata Acuminata"[tiab] OR "genital warts"[tiab] OR "genital wart"[tiab] OR "venereal warts"[tiab] OR "venereal wart"[tiab] OR HIV[tiab] OR "human immunodeficiency virus"[tiab] OR AIDS[tiab] OR "acquired immunodeficiency syndrome"[tiab] OR "pre-exposure prophylaxis" OR "PrEP" OR "health care"[tiab] OR "screening"[tiab] |       |       |    |
| 6  | #1 AND #2 AND #3 AND #4 AND #5                                                                                                                                                                                                                                                                                                                          | 1,333 | 1,398 |    |
| 7  | #6 NOT (Editorial[ptyp] OR Letter[ptyp] OR Comment[ptyp])                                                                                                                                                                                                                                                                                               | 1,333 | 1,398 |    |
| 8  | #7 NOT (animals[MeSH Terms] NOT humans[MeSH Terms])                                                                                                                                                                                                                                                                                                     | 1,333 | 1,398 |    |
| 9  | #8 AND ("2022/05/01"[Date - MeSH] : "3000"[Date - MeSH])                                                                                                                                                                                                                                                                                                |       | 88    |    |
| 10 | #8 AND ("2023/01/01"[Date - MeSH] : "3000"[Date - MeSH])                                                                                                                                                                                                                                                                                                |       |       | 58 |

**Database: CINAHL Complete (EBSCOhost)**

| Set #    |                                                                                                                                                                                                                                                                                          | Results<br>May 20,<br>2022 | Results<br>March<br>13, 2022 | Results<br>August<br>15, 2023 |
|----------|------------------------------------------------------------------------------------------------------------------------------------------------------------------------------------------------------------------------------------------------------------------------------------------|----------------------------|------------------------------|-------------------------------|
| 1<br>Men | MH "Men Who Have Sex With Men" OR TI("men having sex with men" OR "men who have sex with men" OR "men who have sex with other men" OR MSM OR BMSM OR AAMSM) OR AB("men having sex with men" OR "men who have sex with men" OR "men who have sex with other men" OR MSM OR BMSM OR AAMSM) | 8,671                      | 9,214                        | 9,384                         |
| 2        | MH "Male" OR MH "Men" OR TI(male OR males OR men OR man) OR AB(male OR males OR men OR man)                                                                                                                                                                                              | 1,969,073                  | 2,029,807                    | 2,045,543                     |
| 3        | MH "Gay Men" OR MH "Bisexuality" OR TI(bisexual* OR homosexual* OR gay OR gays OR LGBT OR LGBTQ OR LGBTI OR LGBTQIA OR GLBT OR GLBTQ OR nonheterosexual OR "non-heterosexual" OR "non heterosexuals" OR nonheterosexuals OR pansexual* OR polysexual* OR queer OR                        | 20,811                     | 22,282                       | 22,542                        |

|                  |                                                                                                                                                                                                                                                                                                                                                                                                                                                                                                                                                                                           |         |         |         |
|------------------|-------------------------------------------------------------------------------------------------------------------------------------------------------------------------------------------------------------------------------------------------------------------------------------------------------------------------------------------------------------------------------------------------------------------------------------------------------------------------------------------------------------------------------------------------------------------------------------------|---------|---------|---------|
|                  | "same sex" OR "same-sex" OR "sexual minorities" OR "sexual minority" OR "sexual orientation") OR AB(bisexual* OR homosexual* OR gay OR gays OR LGBT OR LGBTQ OR LGBTI OR LGBTQIA OR GLBT OR GLBTQ OR nonheterosexual OR "non-heterosexual" OR "non heterosexuals" OR nonheterosexuals OR pansexual* OR polysexual* OR queer OR "same sex" OR "same-sex" OR "sexual minorities" OR "sexual minority" OR "sexual orientation")                                                                                                                                                              |         |         |         |
| 4                | S2 AND S3                                                                                                                                                                                                                                                                                                                                                                                                                                                                                                                                                                                 | 13,448  | 14,265  | 14,458  |
| 5                | S1 OR S4                                                                                                                                                                                                                                                                                                                                                                                                                                                                                                                                                                                  | 19,066  | 20,283  | 20,611  |
| 6<br>Young adult | MH "Young Adult" OR MH "Adolescence+" OR MH "Adolescent Health" OR MH "Adolescent Health Services" OR TI("young adult" OR "young adults" OR "young adulthood" OR AYA OR adolescence OR adolescent OR adolescents OR youth OR youths OR "emerging adult" OR "emerging adults" OR teen OR teens OR teenager OR teenagers) OR AB("young adult" OR "young adults" OR "young adulthood" OR AYA OR adolescence OR adolescent OR adolescents OR youth OR youths OR "emerging adult" OR "emerging adults" OR teen OR teens OR teenager OR teenagers)                                              | 769,001 | 798,108 | 805,024 |
| 7<br>Black       | MH "Black Persons" OR MH "Minority Groups" OR TI("minority groups" OR "minority population" OR "minority populations" OR "African American" OR "African Americans" OR "African ancestry" OR Black OR Blacks OR "minority group" OR "minority health" OR minority OR minorities OR marginalize OR marginalized OR marginalizing OR marginalise OR marginalised OR marginalizing OR oppressed OR BIPOC OR underserved OR disadvantaged OR "afro-american" OR "Afro-Caribbean" OR "Black Caribbean" OR "African Caribbean" OR "Black West Indian" OR "Afro West Indian" OR "Black Antillean" | 148,596 | 157,755 | 160,002 |

|    |                                                                                                                                                                                                                                                                                                                                                                                                                                                                                                                                                                                                                                                                          |         |         |         |
|----|--------------------------------------------------------------------------------------------------------------------------------------------------------------------------------------------------------------------------------------------------------------------------------------------------------------------------------------------------------------------------------------------------------------------------------------------------------------------------------------------------------------------------------------------------------------------------------------------------------------------------------------------------------------------------|---------|---------|---------|
|    | OR "Afro Antillean" OR "African diaspora" OR "black Creole") OR AB("minority groups" OR "minority population" OR "minority populations" OR "African American" OR "African Americans" OR "African ancestry" OR Black OR Blacks OR "minority group" OR "minority health" OR minority OR minorities OR marginalize OR marginalized OR marginalizing OR marginalise OR marginalised OR marginalizing OR oppressed OR BIPOC OR underserved OR disadvantaged OR "afro-american" OR "Afro-Caribbean" OR "Black Caribbean" OR "African Caribbean" OR "Black West Indian" OR "Afro West Indian" OR "Black Antillean" OR "Afro Antillean" OR "African diaspora" OR "black Creole") |         |         |         |
| 8  | TI(Jamaica OR Jamaican OR Haiti OR Haitian OR Bahamas OR Bahamian OR Barbados OR Barbadian OR Bermuda OR Bermudian OR Dominican OR Grenada OR Grenadian OR Kitts OR Kittian OR Nevis OR Nevisian OR Lucia OR Lucian OR Surinam OR Surinamese OR Trinidad OR Trinidadians OR Tobago OR Tobagonians OR Vincent OR Vincentian) OR AB(Jamaica OR Jamaican OR Haiti OR Haitian OR Bahamas OR Bahamian OR Barbados OR Barbadian OR Bermuda OR Bermudian OR Dominican OR Grenada OR Grenadian OR Kitts OR Kittian OR Nevis OR Nevisian OR Lucia OR Lucian OR Surinam OR Surinamese OR Trinidad OR Trinidadians OR Tobago OR Tobagonians OR Vincent OR Vincentian)               | 7,026   | 7,302   | 7,239   |
| 9  | TI(America OR American OR Americans OR Afro OR African) OR AB(America OR American OR Americans OR Afro OR African)                                                                                                                                                                                                                                                                                                                                                                                                                                                                                                                                                       | 239,010 | 249,614 | 248,686 |
| 10 | S8 AND S9                                                                                                                                                                                                                                                                                                                                                                                                                                                                                                                                                                                                                                                                | 1,078   | 1,140   | 1,142   |

|                                              |                                                                                                                                                                                                                                                                                                                                                                                                                                                                                                                                                                                                                                                                                                                                                                                                                                                                                                                                                                                                                                                                                                                                                                                                                                                                                                                                                 |         |         |         |
|----------------------------------------------|-------------------------------------------------------------------------------------------------------------------------------------------------------------------------------------------------------------------------------------------------------------------------------------------------------------------------------------------------------------------------------------------------------------------------------------------------------------------------------------------------------------------------------------------------------------------------------------------------------------------------------------------------------------------------------------------------------------------------------------------------------------------------------------------------------------------------------------------------------------------------------------------------------------------------------------------------------------------------------------------------------------------------------------------------------------------------------------------------------------------------------------------------------------------------------------------------------------------------------------------------------------------------------------------------------------------------------------------------|---------|---------|---------|
| 11                                           | S7 OR S10                                                                                                                                                                                                                                                                                                                                                                                                                                                                                                                                                                                                                                                                                                                                                                                                                                                                                                                                                                                                                                                                                                                                                                                                                                                                                                                                       | 149,312 | 158,515 | 160,757 |
| 12<br>Discrimination<br>Racism<br>Homophobia | MH "Racism" OR MH "Homophobia" OR MH "Prejudice" OR MH "Masculinity" OR MH "Stereotyping" OR TI(Racism OR racisms OR Racial OR prejudice OR prejudiced OR prejudicing OR prejudices OR discriminate OR discriminates OR discriminated OR discrimination OR discriminating OR "social perceptions" OR "social perception" OR "social identity" OR "social identities" OR isolation OR isolate OR isolates OR isolating OR isolated OR mistreat OR mistreats OR mistreated OR alienate OR alienates OR alienated OR mistreatment OR alienation OR homophobia OR homophobic OR masculine OR masculinities OR masculinity OR perception OR perceptions OR bias OR microaggression or microaggressions OR homonegativity) OR AB(Racism OR racisms OR Racial OR prejudice OR prejudiced OR prejudicing OR prejudices OR discriminate OR discriminates OR discriminated OR discrimination OR discriminating OR "social perceptions" OR "social perception" OR "social identity" OR "social identities" OR isolation OR isolate OR isolates OR isolating OR isolated OR mistreat OR mistreats OR mistreated OR alienate OR alienates OR alienated OR mistreatment OR alienation OR homophobia OR homophobic OR masculine OR masculinities OR masculinity OR perception OR perceptions OR bias OR microaggression or microaggressions OR homonegativity) | 390,267 | 417,336 | 425,827 |
| 13<br>Sexual health                          | MH "Sexual Health" OR MH "Contraceptive Agents, Male" OR MH "Contraceptive Devices+" OR MH "Sexual Behavior+" OR MH "Sex Education" OR MH "Sexually Transmitted Diseases+" OR MH "Condoms+" OR TI(sex OR sexual OR sexuality OR                                                                                                                                                                                                                                                                                                                                                                                                                                                                                                                                                                                                                                                                                                                                                                                                                                                                                                                                                                                                                                                                                                                 | 745,846 | 785,331 | 789,919 |

|    |                                                                                                                                                                                                                                                                                                                                                                                                                                                                                                                                                                                                                                                                                                                                                                                                                                                                                                                                                                                                                                                                                                                                                                                                                                                                                                                                                                                                                                                                                                                                                                                          |     |     |     |
|----|------------------------------------------------------------------------------------------------------------------------------------------------------------------------------------------------------------------------------------------------------------------------------------------------------------------------------------------------------------------------------------------------------------------------------------------------------------------------------------------------------------------------------------------------------------------------------------------------------------------------------------------------------------------------------------------------------------------------------------------------------------------------------------------------------------------------------------------------------------------------------------------------------------------------------------------------------------------------------------------------------------------------------------------------------------------------------------------------------------------------------------------------------------------------------------------------------------------------------------------------------------------------------------------------------------------------------------------------------------------------------------------------------------------------------------------------------------------------------------------------------------------------------------------------------------------------------------------|-----|-----|-----|
|    | <p>sexualities OR sexually OR intercourse OR "Sexually Transmitted Diseases" OR "Sexually Transmitted Disease" OR "Sexually Transmitted Infections" OR "Sexually Transmitted Infection" OR STD OR STDs OR STI OR STIs OR "Venereal Diseases" OR "Venereal Disease" OR contraception OR contraceptive OR contraceptives OR condom OR condoms OR "sexual health" OR chancroid OR chlamydia OR chancroids OR gonorrhea OR "granuloma inguinale" OR syphilis OR "genital herpes" OR "genital herpes" OR "Condylomata Acuminata" OR "genital warts" OR "genital wart" OR "venereal warts" OR "venereal wart" OR HIV OR "human immunodeficiency virus" OR AIDS OR "acquired immunodeficiency syndrome" OR "pre-exposure prophylaxis" OR "PrEP" OR "health care" OR "screening") OR AB(sex OR sexual OR sexuality OR sexualities OR sexually OR intercourse OR "Sexually Transmitted Diseases" OR "Sexually Transmitted Disease" OR "Sexually Transmitted Infections" OR "Sexually Transmitted Infection" OR STD OR STDs OR STI OR STIs OR "Venereal Diseases" OR "Venereal Disease" OR contraception OR contraceptive OR contraceptives OR condom OR condoms OR "sexual health" OR chancroid OR chlamydia OR chancroids OR gonorrhea OR "granuloma inguinale" OR syphilis OR "genital herpes" OR "genital herpes" OR "Condylomata Acuminata" OR "genital warts" OR "genital wart" OR "venereal warts" OR "venereal wart" OR HIV OR "human immunodeficiency virus" OR AIDS OR "acquired immunodeficiency syndrome" OR "pre-exposure prophylaxis" OR "PrEP" OR "health care" OR "screening")</p> |     |     |     |
| 14 | S5 AND S6 AND S11 AND S12 AND S13                                                                                                                                                                                                                                                                                                                                                                                                                                                                                                                                                                                                                                                                                                                                                                                                                                                                                                                                                                                                                                                                                                                                                                                                                                                                                                                                                                                                                                                                                                                                                        | 608 | 665 | 689 |
| 15 | Limiters - Research Article; Peer Reviewed                                                                                                                                                                                                                                                                                                                                                                                                                                                                                                                                                                                                                                                                                                                                                                                                                                                                                                                                                                                                                                                                                                                                                                                                                                                                                                                                                                                                                                                                                                                                               | 495 | 544 | 564 |
| 16 | Limiters - Published Date: 20220501-20230331                                                                                                                                                                                                                                                                                                                                                                                                                                                                                                                                                                                                                                                                                                                                                                                                                                                                                                                                                                                                                                                                                                                                                                                                                                                                                                                                                                                                                                                                                                                                             |     | 49  |     |
| 17 | Limiters - Date: 20230301-                                                                                                                                                                                                                                                                                                                                                                                                                                                                                                                                                                                                                                                                                                                                                                                                                                                                                                                                                                                                                                                                                                                                                                                                                                                                                                                                                                                                                                                                                                                                                               |     |     | 20  |



**Database: APA PsycINFO (EBSCOhost)**

| Set #            |                                                                                                                                                                                                                                                                                                                                                                                                                                                                                                                                                                                                                                                                                                                                        | Results<br>May<br>20,<br>2022 | Results<br>March<br>13,<br>2022 | Results<br>August<br>15,<br>2023 |
|------------------|----------------------------------------------------------------------------------------------------------------------------------------------------------------------------------------------------------------------------------------------------------------------------------------------------------------------------------------------------------------------------------------------------------------------------------------------------------------------------------------------------------------------------------------------------------------------------------------------------------------------------------------------------------------------------------------------------------------------------------------|-------------------------------|---------------------------------|----------------------------------|
| 1<br>Men         | TI("men having sex with men" OR "men who have sex with men" OR "men who have sex with other men" OR MSM OR BMSM OR AAMSM) OR AB("men having sex with men" OR "men who have sex with other men" OR MSM OR BMSM OR AAMSM)                                                                                                                                                                                                                                                                                                                                                                                                                                                                                                                | 5,942                         | 6,251                           | 6,378                            |
| 2                | DE "Human Males" OR TI(male OR males OR men OR man) OR AB(male OR males OR men OR man)                                                                                                                                                                                                                                                                                                                                                                                                                                                                                                                                                                                                                                                 | 585,984                       | 600,251                         | 607,965                          |
| 3                | DE "Same Sex Intercourse" OR DE "Male Homosexuality" OR DE "Bisexuality" OR TI(bisexual* OR homosexual* OR gay OR gays OR LGBT OR LGBTQ OR LGBTI OR LGBTQIA OR GLBT OR GLBTQ OR nonheterosexual OR "non-heterosexual" OR "non heterosexuals" OR nonheterosexuals OR pansexual* OR polysexual* OR queer OR "same sex" OR "same-sex" OR "sexual minorities" OR "sexual minority" OR "sexual orientation") OR AB(bisexual* OR homosexual* OR gay OR gays OR LGBT OR LGBTQ OR LGBTI OR LGBTQIA OR GLBT OR GLBTQ OR nonheterosexual OR "non-heterosexual" OR "non heterosexuals" OR nonheterosexuals OR pansexual* OR polysexual* OR queer OR "same sex" OR "same-sex" OR "sexual minorities" OR "sexual minority" OR "sexual orientation") | 57,930                        | 60,136                          | 61,463                           |
| 4                | S2 AND S3                                                                                                                                                                                                                                                                                                                                                                                                                                                                                                                                                                                                                                                                                                                              | 27,865                        | 28,838                          | 29,366                           |
| 5                | S1 OR S4                                                                                                                                                                                                                                                                                                                                                                                                                                                                                                                                                                                                                                                                                                                               | 29,068                        | 30,092                          | 30,616                           |
| 6<br>Young adult | DE "Emerging Adulthood" OR DE "Adolescent Health" OR TI("young adult" OR "young adults" OR "young adulthood" OR AYA OR adolescence OR adolescent OR adolescents OR youth OR youths OR "emerging adult" OR "emerging adults" OR teen OR teens OR teenager OR teenagers) OR AB("young adult" OR "young adults" OR "young adulthood" OR AYA OR adolescence OR adolescent OR                                                                                                                                                                                                                                                                                                                                                               | 370,179                       | 384,717                         | 393,122                          |

|            |                                                                                                                                                                                                                                                                                                                                                                                                                                                                                                                                                                                                                                                                                                                                                                                                                                                                                                                                                                                                                                                                                                                                                                                                                                                             |         |         |         |
|------------|-------------------------------------------------------------------------------------------------------------------------------------------------------------------------------------------------------------------------------------------------------------------------------------------------------------------------------------------------------------------------------------------------------------------------------------------------------------------------------------------------------------------------------------------------------------------------------------------------------------------------------------------------------------------------------------------------------------------------------------------------------------------------------------------------------------------------------------------------------------------------------------------------------------------------------------------------------------------------------------------------------------------------------------------------------------------------------------------------------------------------------------------------------------------------------------------------------------------------------------------------------------|---------|---------|---------|
|            | adolescents OR youth OR youths OR "emerging adult" OR "emerging adults" OR teen OR teens OR teenager OR teenagers)                                                                                                                                                                                                                                                                                                                                                                                                                                                                                                                                                                                                                                                                                                                                                                                                                                                                                                                                                                                                                                                                                                                                          |         |         |         |
| 7<br>Black | DE "Blacks" OR DE "Minority Groups" OR TI("minority groups" OR "minority population" OR "minority populations" OR "African American" OR "African Americans" OR "African ancestry" OR Black OR Blacks OR "minority group" OR "minority health" OR minority OR minorities OR marginalize OR marginalized OR marginalizing OR marginalise OR marginalised OR marginalizing OR oppressed OR BIPOC OR underserved OR disadvantaged OR "afro-american" OR "Afro-Caribbean" OR "Black Caribbean" OR "African Caribbean" OR "Black West Indian" OR "Afro West Indian" OR "Black Antillean" OR "Afro Antillean" OR "African diaspora" OR "black Creole") OR AB("minority groups" OR "minority population" OR "minority populations" OR "African American" OR "African Americans" OR "African ancestry" OR Black OR Blacks OR "minority group" OR "minority health" OR minority OR minorities OR marginalize OR marginalized OR marginalizing OR marginalise OR marginalised OR marginalizing OR oppressed OR BIPOC OR underserved OR disadvantaged OR "afro-american" OR "Afro-Caribbean" OR "Black Caribbean" OR "African Caribbean" OR "Black West Indian" OR "Afro West Indian" OR "Black Antillean" OR "Afro Antillean" OR "African diaspora" OR "black Creole") | 192,455 | 201,169 | 206,202 |
| 8          | TI(Jamaica OR Jamaican OR Haiti OR Haitian OR Bahamas OR Bahamian OR Barbados OR Barbadian OR Bermuda OR Bermudian OR Dominican OR Grenada OR Grenadian OR Kitts OR Kittian OR Nevis OR Nevisian OR Lucia OR Lucian OR Surinam OR Surinamese OR Trinidad OR Trinidadians OR Tobago OR Tobagonians OR Vincent OR Vincentian) OR AB(Jamaica OR Jamaican OR Haiti OR Haitian OR Bahamas OR Bahamian OR Barbados OR Barbadian OR Bermuda OR Bermudian OR Dominican OR Grenada OR Grenadian OR Kitts OR Kittian OR Nevis OR Nevisian OR                                                                                                                                                                                                                                                                                                                                                                                                                                                                                                                                                                                                                                                                                                                          | 7,033   | 7,301   | 7,416   |

|                                              |                                                                                                                                                                                                                                                                                                                                                                                                                                                                                                                                                                                                                                                                                                                                                                                                                                                                                                                                                                                                                                                                                                                                                                                                                                                                                                                                                 |         |         |         |
|----------------------------------------------|-------------------------------------------------------------------------------------------------------------------------------------------------------------------------------------------------------------------------------------------------------------------------------------------------------------------------------------------------------------------------------------------------------------------------------------------------------------------------------------------------------------------------------------------------------------------------------------------------------------------------------------------------------------------------------------------------------------------------------------------------------------------------------------------------------------------------------------------------------------------------------------------------------------------------------------------------------------------------------------------------------------------------------------------------------------------------------------------------------------------------------------------------------------------------------------------------------------------------------------------------------------------------------------------------------------------------------------------------|---------|---------|---------|
|                                              | Lucia OR Lucian OR Surinam OR Surinamese OR Trinidad OR Trinidadians OR Tobago OR Tobagonians OR Vincent OR Vincentian)                                                                                                                                                                                                                                                                                                                                                                                                                                                                                                                                                                                                                                                                                                                                                                                                                                                                                                                                                                                                                                                                                                                                                                                                                         |         |         |         |
| 9                                            | TI(America OR American OR Americans OR Afro OR African) OR AB(America OR American OR Americans OR Afro OR African)                                                                                                                                                                                                                                                                                                                                                                                                                                                                                                                                                                                                                                                                                                                                                                                                                                                                                                                                                                                                                                                                                                                                                                                                                              | 232,322 | 238,787 | 242,452 |
| 10                                           | S8 AND S9                                                                                                                                                                                                                                                                                                                                                                                                                                                                                                                                                                                                                                                                                                                                                                                                                                                                                                                                                                                                                                                                                                                                                                                                                                                                                                                                       | 1,339   | 1,393   | 1,424   |
| 11                                           | S7 OR S10                                                                                                                                                                                                                                                                                                                                                                                                                                                                                                                                                                                                                                                                                                                                                                                                                                                                                                                                                                                                                                                                                                                                                                                                                                                                                                                                       | 193,218 | 201,964 | 207,016 |
| 12<br>Discrimination<br>Racism<br>Homophobia | DE "Racism" OR DE "Systemic Racism" OR DE "Homosexuality (Attitudes Toward)" OR DE "Prejudice" OR DE "Masculinity" OR DE "Stereotyped Attitudes" OR TI(Racism OR racisms OR Racial OR prejudice OR prejudiced OR prejudicing OR prejudices OR discriminate OR discriminates OR discriminated OR discrimination OR discriminating OR "social perceptions" OR "social perception" OR "social identity" OR "social identities" OR isolation OR isolate OR isolates OR isolating OR isolated OR mistreat OR mistreats OR mistreated OR alienate OR alienates OR alienated OR mistreatment OR alienation OR homophobia OR homophobic OR masculine OR masculinities OR masculinity OR perception OR perceptions OR bias OR microaggression or microaggressions OR homonegativity) OR AB(Racism OR racisms OR Racial OR prejudice OR prejudiced OR prejudicing OR prejudices OR discriminate OR discriminates OR discriminated OR discrimination OR discriminating OR "social perceptions" OR "social perception" OR "social identity" OR "social identities" OR isolation OR isolate OR isolates OR isolating OR isolated OR mistreat OR mistreats OR mistreated OR alienate OR alienates OR alienated OR mistreatment OR alienation OR homophobia OR homophobic OR masculine OR masculinities OR masculinity OR perception OR perceptions OR bias OR | 648,239 | 674,045 | 688,522 |

|                     |                                                                                                                                                                                                                                                                                                                                                                                                                                                                                                                                                                                                                                                                                                                                                                                                                                                                                                                                                                                                                                                                                                                                                                                                                                                                                                                                                                                                                                                                                                                                                                                                                                                                                                                                                                                      |         |         |         |
|---------------------|--------------------------------------------------------------------------------------------------------------------------------------------------------------------------------------------------------------------------------------------------------------------------------------------------------------------------------------------------------------------------------------------------------------------------------------------------------------------------------------------------------------------------------------------------------------------------------------------------------------------------------------------------------------------------------------------------------------------------------------------------------------------------------------------------------------------------------------------------------------------------------------------------------------------------------------------------------------------------------------------------------------------------------------------------------------------------------------------------------------------------------------------------------------------------------------------------------------------------------------------------------------------------------------------------------------------------------------------------------------------------------------------------------------------------------------------------------------------------------------------------------------------------------------------------------------------------------------------------------------------------------------------------------------------------------------------------------------------------------------------------------------------------------------|---------|---------|---------|
|                     | microaggression or microaggressions OR homonegativity)                                                                                                                                                                                                                                                                                                                                                                                                                                                                                                                                                                                                                                                                                                                                                                                                                                                                                                                                                                                                                                                                                                                                                                                                                                                                                                                                                                                                                                                                                                                                                                                                                                                                                                                               |         |         |         |
| 13<br>Sexual health | DE "Sexual Health" OR DE "Contraceptive Devices" OR DE "Psychosexual Behavior" OR DE "Sex Education" OR DE "Sexually Transmitted Diseases" OR DE "Condoms" OR TI(sex OR sexual OR sexuality OR sexualities OR sexually OR intercourse OR "Sexually Transmitted Diseases" OR "Sexually Transmitted Disease" OR "Sexually Transmitted Infections" OR "Sexually Transmitted Infection" OR STD OR STDs OR STI OR STIs OR "Venereal Diseases" OR "Venereal Disease" OR contraception OR contraceptive OR contraceptives OR condom OR condoms OR "sexual health" OR chancroid OR chlamydia OR chancroids OR gonorrhea OR "granuloma inguinale" OR syphilis OR "genital herpes" OR "genitalis herpes" OR "Condylomata Acuminata" OR "genital warts" OR "genital wart" OR "venereal warts" OR "venereal wart" OR HIV OR "human immunodeficiency virus" OR AIDS OR "acquired immunodeficiency syndrome" OR "pre-exposure prophylaxis" OR "PrEP" OR "health care" OR "screening") OR AB(sex OR sexual OR sexuality OR sexualities OR sexually OR intercourse OR "Sexually Transmitted Diseases" OR "Sexually Transmitted Disease" OR "Sexually Transmitted Infections" OR "Sexually Transmitted Infection" OR STD OR STDs OR STI OR STIs OR "Venereal Diseases" OR "Venereal Disease" OR contraception OR contraceptive OR contraceptives OR condom OR condoms OR "sexual health" OR chancroid OR chlamydia OR chancroids OR gonorrhea OR "granuloma inguinale" OR syphilis OR "genital herpes" OR "genitalis herpes" OR "Condylomata Acuminata" OR "genital warts" OR "genital wart" OR "venereal warts" OR "venereal wart" OR HIV OR "human immunodeficiency virus" OR AIDS OR "acquired immunodeficiency syndrome" OR "pre-exposure prophylaxis" OR "PrEP" OR "health care" OR "screening") | 548,094 | 567,117 | 577,612 |
| 14                  | S5 AND S6 AND S11 AND S12 AND S13                                                                                                                                                                                                                                                                                                                                                                                                                                                                                                                                                                                                                                                                                                                                                                                                                                                                                                                                                                                                                                                                                                                                                                                                                                                                                                                                                                                                                                                                                                                                                                                                                                                                                                                                                    | 281     | 306     | 318     |
| 15                  | Limiters – Academic journals                                                                                                                                                                                                                                                                                                                                                                                                                                                                                                                                                                                                                                                                                                                                                                                                                                                                                                                                                                                                                                                                                                                                                                                                                                                                                                                                                                                                                                                                                                                                                                                                                                                                                                                                                         | 213     | 234     |         |
| 16                  | Limiters - Published Date: 20220501-20230331                                                                                                                                                                                                                                                                                                                                                                                                                                                                                                                                                                                                                                                                                                                                                                                                                                                                                                                                                                                                                                                                                                                                                                                                                                                                                                                                                                                                                                                                                                                                                                                                                                                                                                                                         |         | 20      |         |

|    |                                                    |  |  |     |
|----|----------------------------------------------------|--|--|-----|
| 17 | Limiters - Publication Type: Peer Reviewed Journal |  |  | 241 |
| 18 |                                                    |  |  | 15  |

**Database: Sociology Source Ultimate (EBSCOhost)**

| Set #    |                                                                                                                                                                                                                                                                                                                                                                                                                                                                                                                                                                                                                                                                                                      | Results<br>May<br>20,<br>2022 | Results<br>March<br>13,<br>2022 | Results<br>August<br>15,<br>2023 |
|----------|------------------------------------------------------------------------------------------------------------------------------------------------------------------------------------------------------------------------------------------------------------------------------------------------------------------------------------------------------------------------------------------------------------------------------------------------------------------------------------------------------------------------------------------------------------------------------------------------------------------------------------------------------------------------------------------------------|-------------------------------|---------------------------------|----------------------------------|
| 1<br>Men | DE "MEN who have sex with men" OR TI("men having sex with men" OR "men who have sex with men" OR "men who have sex with other men" OR MSM OR BMSM OR AAMSM) OR AB("men having sex with men" OR "men who have sex with men" OR "men who have sex with other men" OR MSM OR BMSM OR AAMSM)                                                                                                                                                                                                                                                                                                                                                                                                             | 1,672                         | 1,760                           | 1,763                            |
| 2        | DE "Men" OR TI(male OR males OR men OR man) OR AB(male OR males OR men OR man)                                                                                                                                                                                                                                                                                                                                                                                                                                                                                                                                                                                                                       | 170,454                       | 178,737                         | 181,152                          |
| 3        | DE "Homosexuality" OR DE "Bisexuality" OR TI(bisexual* OR homosexual* OR gay OR gays OR LGBT OR LGBTQ OR LGBTI OR LGBTQIA OR GLBT OR GLBTQ OR nonheterosexual OR "non-heterosexual" OR "non heterosexuals" OR nonheterosexuals OR pansexual* OR polysexual* OR queer OR "same sex" OR "same-sex" OR "sexual minorities" OR "sexual minority" OR "sexual orientation") OR AB(bisexual* OR homosexual* OR gay OR gays OR LGBT OR LGBTQ OR LGBTI OR LGBTQIA OR GLBT OR GLBTQ OR nonheterosexual OR "non-heterosexual" OR "non heterosexuals" OR nonheterosexuals OR pansexual* OR polysexual* OR queer OR "same sex" OR "same-sex" OR "sexual minorities" OR "sexual minority" OR "sexual orientation") | 34,055                        | 35,969                          | 36,644                           |
| 4        | S2 AND S3                                                                                                                                                                                                                                                                                                                                                                                                                                                                                                                                                                                                                                                                                            | 11,401                        | 11,973                          | 12,142                           |
| 5        | S1 OR S4                                                                                                                                                                                                                                                                                                                                                                                                                                                                                                                                                                                                                                                                                             | 12,349                        | 12,966                          | 13,132                           |
| 6        | DE "Young Adults" OR DE "TEENAGERS" OR DE "ADOLESCENCE" OR DE "Adolescent                                                                                                                                                                                                                                                                                                                                                                                                                                                                                                                                                                                                                            | 138,463                       | 153,415                         | 156,276                          |

|             |                                                                                                                                                                                                                                                                                                                                                                                                                                                                                                                                                                                                                                                                                                                                                                                                                                                                                                                                                                                                                                                                                                                                                                                                                                                                   |         |         |         |
|-------------|-------------------------------------------------------------------------------------------------------------------------------------------------------------------------------------------------------------------------------------------------------------------------------------------------------------------------------------------------------------------------------------------------------------------------------------------------------------------------------------------------------------------------------------------------------------------------------------------------------------------------------------------------------------------------------------------------------------------------------------------------------------------------------------------------------------------------------------------------------------------------------------------------------------------------------------------------------------------------------------------------------------------------------------------------------------------------------------------------------------------------------------------------------------------------------------------------------------------------------------------------------------------|---------|---------|---------|
| Young adult | Health" OR TI("young adult" OR "young adults" OR "young adulthood" OR AYA OR adolescence OR adolescent OR adolescents OR youth OR youths OR "emerging adult" OR "emerging adults" OR teen OR teens OR teenager OR teenagers) OR AB("young adult" OR "young adults" OR "young adulthood" OR AYA OR adolescence OR adolescent OR adolescents OR youth OR youths OR "emerging adult" OR "emerging adults" OR teen OR teens OR teenager OR teenagers)                                                                                                                                                                                                                                                                                                                                                                                                                                                                                                                                                                                                                                                                                                                                                                                                                 |         |         |         |
| 7<br>Black  | DE "Black people" OR DE "PEOPLE of color" OR TI("minority groups" OR "minority population" OR "minority populations" OR "African American" OR "African Americans" OR "African ancestry" OR Black OR Blacks OR "minority group" OR "minority health" OR minority OR minorities OR marginalize OR marginalized OR marginalizing OR marginalise OR marginalised OR marginalizing OR oppressed OR BIPOC OR underserved OR disadvantaged OR "afro-american" OR "Afro-Caribbean" OR "Black Caribbean" OR "African Caribbean" OR "Black West Indian" OR "Afro West Indian" OR "Black Antillean" OR "Afro Antillean" OR "African diaspora" OR "black Creole") OR AB("minority groups" OR "minority population" OR "minority populations" OR "African American" OR "African Americans" OR "African ancestry" OR Black OR Blacks OR "minority group" OR "minority health" OR minority OR minorities OR marginalize OR marginalized OR marginalizing OR marginalise OR marginalised OR marginalizing OR oppressed OR BIPOC OR underserved OR disadvantaged OR "afro-american" OR "Afro-Caribbean" OR "Black Caribbean" OR "African Caribbean" OR "Black West Indian" OR "Afro West Indian" OR "Black Antillean" OR "Afro Antillean" OR "African diaspora" OR "black Creole") | 132,052 | 139,965 | 142,353 |
| 8           | TI(Jamaica OR Jamaican OR Haiti OR Haitian OR Bahamas OR Bahamian OR Barbados OR Barbadian OR Bermuda OR Bermudian OR Dominican OR Grenada OR                                                                                                                                                                                                                                                                                                                                                                                                                                                                                                                                                                                                                                                                                                                                                                                                                                                                                                                                                                                                                                                                                                                     | 8,536   | 8,924   | 9,028   |

|                                              |                                                                                                                                                                                                                                                                                                                                                                                                                                                                                                                                                                                                                                                                                                                                                                                                                                                                                                  |         |         |         |
|----------------------------------------------|--------------------------------------------------------------------------------------------------------------------------------------------------------------------------------------------------------------------------------------------------------------------------------------------------------------------------------------------------------------------------------------------------------------------------------------------------------------------------------------------------------------------------------------------------------------------------------------------------------------------------------------------------------------------------------------------------------------------------------------------------------------------------------------------------------------------------------------------------------------------------------------------------|---------|---------|---------|
|                                              | Grenadian OR Kitts OR Kittian OR Nevis OR Nevisian OR Lucia OR Lucian OR Surinam OR Surinamese OR Trinidad OR Trinidadians OR Tobago OR Tobagonians OR Vincent OR Vincentian) OR AB(Jamaica OR Jamaican OR Haiti OR Haitian OR Bahamas OR Bahamian OR Barbados OR Barbadian OR Bermuda OR Bermudian OR Dominican OR Grenada OR Grenadian OR Kitts OR Kittian OR Nevis OR Nevisian OR Lucia OR Lucian OR Surinam OR Surinamese OR Trinidad OR Trinidadians OR Tobago OR Tobagonians OR Vincent OR Vincentian)                                                                                                                                                                                                                                                                                                                                                                                     |         |         |         |
| 9                                            | TI(America OR American OR Americans OR Afro OR African) OR AB(America OR American OR Americans OR Afro OR African)                                                                                                                                                                                                                                                                                                                                                                                                                                                                                                                                                                                                                                                                                                                                                                               | 262,103 | 270,602 | 273,207 |
| 10                                           | S8 AND S9                                                                                                                                                                                                                                                                                                                                                                                                                                                                                                                                                                                                                                                                                                                                                                                                                                                                                        | 1,595   | 1,668   | 1,694   |
| 11                                           | S7 OR S10                                                                                                                                                                                                                                                                                                                                                                                                                                                                                                                                                                                                                                                                                                                                                                                                                                                                                        | 133,213 | 141,171 | 143,571 |
| 12<br>Discrimination<br>Racism<br>Homophobia | DE "Racism" OR DE "INSTITUTIONAL racism" OR DE "Homophobia" OR DE "Prejudices" OR DE "Masculinity" OR DE "Stereotypes" OR TI(Racism OR racisms OR Racial OR prejudice OR prejudiced OR prejudicing OR prejudices OR discriminate OR discriminates OR discriminated OR discrimination OR discriminating OR "social perceptions" OR "social perception" OR "social identity" OR "social identities" OR isolation OR isolate OR isolates OR isolating OR isolated OR mistreat OR mistreats OR mistreated OR alienate OR alienates OR alienated OR mistreatment OR alienation OR homophobia OR homophobic OR masculine OR masculinities OR masculinity OR perception OR perceptions OR bias OR microaggression or microaggressions OR homonegativity) OR AB(Racism OR racisms OR Racial OR prejudice OR prejudiced OR prejudicing OR prejudices OR discriminate OR discriminates OR discriminated OR | 221,551 | 237,239 | 242,143 |

|                     |                                                                                                                                                                                                                                                                                                                                                                                                                                                                                                                                                                                                                                                                                                                                                                                                                                                                                                                                                                                                                                                                                                                                                                                                                                                                                                                                                                                                                                                                                                                                                                                                               |         |         |         |
|---------------------|---------------------------------------------------------------------------------------------------------------------------------------------------------------------------------------------------------------------------------------------------------------------------------------------------------------------------------------------------------------------------------------------------------------------------------------------------------------------------------------------------------------------------------------------------------------------------------------------------------------------------------------------------------------------------------------------------------------------------------------------------------------------------------------------------------------------------------------------------------------------------------------------------------------------------------------------------------------------------------------------------------------------------------------------------------------------------------------------------------------------------------------------------------------------------------------------------------------------------------------------------------------------------------------------------------------------------------------------------------------------------------------------------------------------------------------------------------------------------------------------------------------------------------------------------------------------------------------------------------------|---------|---------|---------|
|                     | discrimination OR discriminating OR "social perceptions" OR "social perception" OR "social identity" OR "social identities" OR isolation OR isolate OR isolates OR isolating OR isolated OR mistreat OR mistreats OR mistreated OR alienate OR alienates OR alienated OR mistreatment OR alienation OR homophobia OR homophobic OR masculine OR masculinities OR masculinity OR perception OR perceptions OR bias OR microaggression or microaggressions OR homonegativity)                                                                                                                                                                                                                                                                                                                                                                                                                                                                                                                                                                                                                                                                                                                                                                                                                                                                                                                                                                                                                                                                                                                                   |         |         |         |
| 13<br>Sexual health | DE "Sexual Health" OR DE "MALE contraceptives" OR DE "HUMAN sexuality" OR DE "Sex Education" OR DE "Sexually Transmitted Diseases" OR DE "Condoms" OR TI(sex OR sexual OR sexuality OR sexualities OR sexually OR intercourse OR "Sexually Transmitted Diseases" OR "Sexually Transmitted Disease" OR "Sexually Transmitted Infections" OR "Sexually Transmitted Infection" OR STD OR STDs OR STI OR STIs OR "Venereal Diseases" OR "Venereal Disease" OR contraception OR contraceptive OR contraceptives OR condom OR condoms OR "sexual health" OR chancroid OR chlamydia OR chancroids OR gonorrhea OR "granuloma inguinale" OR syphilis OR "genital herpes" OR "genital herpes" OR "Condylomata Acuminata" OR "genital warts" OR "genital wart" OR "venereal warts" OR "venereal wart" OR HIV OR "human immunodeficiency virus" OR AIDS OR "acquired immunodeficiency syndrome" OR "pre-exposure prophylaxis" OR "PrEP" OR "health care" OR "screening") OR AB(sex OR sexual OR sexuality OR sexualities OR sexually OR intercourse OR "Sexually Transmitted Diseases" OR "Sexually Transmitted Disease" OR "Sexually Transmitted Infections" OR "Sexually Transmitted Infection" OR STD OR STDs OR STI OR STIs OR "Venereal Diseases" OR "Venereal Disease" OR contraception OR contraceptive OR contraceptives OR condom OR condoms OR "sexual health" OR chancroid OR chlamydia OR chancroids OR gonorrhea OR "granuloma inguinale" OR syphilis OR "genital herpes" OR "genital herpes" OR "Condylomata Acuminata" OR "genital warts" OR "genital wart" OR "venereal warts" OR "venereal wart" OR HIV | 211,224 | 222,456 | 224,363 |



|    |                                                                                                                                                                     |    |     |     |
|----|---------------------------------------------------------------------------------------------------------------------------------------------------------------------|----|-----|-----|
|    | OR "human immunodeficiency virus" OR AIDS<br>OR "acquired immunodeficiency syndrome" OR<br>"pre-exposure prophylaxis" OR "PrEP" OR<br>"health care" OR "screening") |    |     |     |
| 14 | S5 AND S6 AND S11 AND S12 AND S13                                                                                                                                   | 91 | 100 | 104 |
| 15 | Limiters – Academic journals                                                                                                                                        | 77 | 86  |     |
| 16 | Limiters - Published Date: 20220501-20230331                                                                                                                        |    | 6   |     |
| 17 | Limiters - Scholarly (Peer Reviewed) Journals                                                                                                                       |    |     | 91  |
| 18 | Limiters - Published Date: 20230301-                                                                                                                                |    |     | 4   |
